30 **Abstract:**

31 Clinical data demonstrate an increased predisposition to cardiovascular disease (CVD) following  
32 severe COVID-19 infection. This may be driven by a dysregulated immune response associated  
33 with severe disease. Monocytes and vascular tissue resident macrophages play a critical role in  
34 atherosclerosis, the main pathology leading to ischemic CVD. Natural killer (NK) cells are a  
35 heterogenous group of cells that are critical during viral pathogenesis and are known to be  
36 dysregulated during severe COVID-19 infection. Their role in atherosclerotic cardiovascular  
37 disease has recently been described. However, the contribution of their altered phenotypes to  
38 atherogenesis following severe COVID-19 infection is unknown. We demonstrate for the first  
39 time that during and after severe COVID-19, circulating proinflammatory monocytes and  
40 activated NK cells act synergistically to increase uptake of oxidized low-density lipoprotein (Ox-  
41 LDL) into vascular tissue with subsequent foam cell generation leading to atherogenesis despite  
42 recovery from acute infection. Our data provide new insights, revealing the roles of  
43 monocytes/macrophages, and NK cells in COVID-19-related atherogenesis.

44

45

46

47

48

49

50

51

52

53

54

55

56 **Introduction:**

57 An increasing body of evidence suggests that coronavirus disease 2019 (COVID-19), caused by  
58 severe acute respiratory syndrome coronavirus 2 (SARS-CoV-2) predisposes affected  
59 individuals to CVDs including acute myocardial infarction and stroke<sup>1</sup>. Atherosclerosis is the  
60 main pathophysiological process underlying most cases of CVDs in humans<sup>2</sup>. It is a chronic  
61 inflammatory condition which can lead to coronary artery calcification and an overall  
62 prothrombotic state culminating in CVD pathology<sup>3,4</sup>. Monocytes and macrophages are central  
63 to the pathogenesis of atherosclerosis. Upon recruitment to the intima of arteries following lipid  
64 deposition, circulating monocytes differentiate into a broad spectrum of proinflammatory  
65 macrophages (M1 type), lipid-laden foam cells, and dendritic cells<sup>5</sup>.

66 Recent studies using coronary autopsy specimens from patients with COVID-19 revealed that  
67 infiltrating macrophages are infected by SARS-CoV-2, with foam cells, a hallmark of  
68 atherosclerosis at all stages of the disease, being more susceptible to SARS-CoV-2 infection  
69 than other macrophages. Furthermore, SARS-CoV-2 was found to induce a strong pro-  
70 atherogenic inflammatory response in both macrophages and foam cells, a phenomenon that  
71 was largely recapitulated in an *ex vivo* SARS-CoV-2 infection of human vascular explants,  
72 suggesting a potential mechanism for increased risk of atherosclerosis following COVID-19  
73 infection<sup>6</sup>. Monocytes and macrophages are in constant direct and indirect (via soluble  
74 mediators) communication with several other immune cells.

75 During viral pathogenesis, one of the earliest cell types to arrive at the site of infection are NK  
76 cells which in partnership with monocytes/macrophages, trigger an immune response. A new  
77 understanding of the functions of monocytes and macrophages in health and diseases is  
78 emerging where NK cells play a crucial intermediary role<sup>7</sup>. The role of NK cells in “normal”  
79 atherosclerosis has been described previously. However, the phenotypic and functional  
80 associations of NK cells in COVID-19-associated atherosclerosis are not fully known.

81 For the first time, we demonstrate that in the peripheral blood of patients during and after severe  
82 COVID-19, monocytes and NK cells are activated and may influence the consumption of  
83 oxidized lipids from the circulation. This ongoing process results in the generation of foam cells  
84 in vascular tissue, suggestive of persistent atherogenesis even after recovery. *In vitro*  
85 experiments and correlational analyses have led to a mechanistic interpretation that suggests a  
86 direct crosstalk between activated NK cells and macrophages during COVID-19, leading to an  
87 increased uptake of Ox-LDL from the environment, subsequently resulting in foam cell  
88 generation and atherogenesis.

89

## 90 **Material and Methods:**

91 **Patient characteristics:** Patients were enrolled in the Ohio State University Intensive Care Unit  
92 Registry (BuckICU, IRB: 2020H0175) at the Ohio State University Wexner Medical Center and  
93 the James Cancer Hospital and Solove Research Institute between April 2020 and January  
94 2021. BuckICU is a multi-disciplinary biorepository project that collects human biospecimens  
95 and associated clinical data from critically ill patients admitted to the ICU (severe) with  
96 respiratory failure, defined as any increase in respiratory support (supplemental oxygen or need  
97 for invasive or non-invasive mechanical ventilation) above baseline. For this study, we analyzed  
98 samples from thirty-one critically ill patients with severe COVID-19 disease (SARS-CoV-2  
99 RNA+) (n=31), between 28 and 69 years of age. Patients with current malignant diseases,  
100 ongoing immunomodulatory treatment before hospitalization, and known diabetes mellitus were  
101 excluded. Seventeen healthy controls (Control) that were SARS-CoV-2 immunoglobulin G (IgG)  
102 seronegative and symptom-free at sampling were recruited as controls, with ages ranging from  
103 25 to 65 years old. To minimize inter-experimental variability and batch effects between patients  
104 and controls, all samples (n=77) were acquired, processed, and analyzed fresh during the  
105 period between April 2020 and January 2021. Another group of individuals at an age range of  
106 24 to 60 were recruited after three months of recovery from COVID-19 infection (n=29)

107 (Recovered) at the peak of the COVID-19 pandemic in the United States (August 2020).  
108 Supplementary Table 1 and Materials and Methods both provide more specific patient  
109 characteristics. To study the innate cell response, we stained fresh whole blood with a 20-color  
110 innate cell–focused flow cytometry panel. All clinical laboratory analyses, including serology  
111 and polymerase chain reaction (PCR) for SARS-CoV-2, were performed using clinical routine  
112 assays in the clinical laboratories at The Ohio State University Wexner Medical Center,  
113 Columbus, Ohio. We obtained approval by the Research Ethics Committee in The Ohio State  
114 University under following IRB protocols (2020H0175, 2020H0228, 2014H0467, 2020H0339)  
115 and all patients gave written informed consent. For detailed clinical information, see  
116 Supplementary Table 1.

117

118 **Flow cytometry staining and Data acquisition:** Patients underwent a blood draw performed  
119 by a trained phlebotomist. Peripheral blood from healthy donors and patients was collected into  
120 sodium citrate tubes (BD, Franklin Lakes, NJ) and whole blood staining was performed. After  
121 collection, 120µL of whole blood was separated into polystyrene FACS (fluorescence-activated  
122 cell sorting) tubes and red blood cells were lysed using ACK buffer (ThermoFisher, Waltham,  
123 Massachusetts) for 5 minutes followed by a wash with R10 media (RPMI-1640 supplemented  
124 with 10% FBS [fetal bovine serum], 2 mM L glutamine, 100 U/mL penicillin, and 100mg/mL  
125 streptomycin). After washing with phosphate-buffered saline (PBS), cells were pre-stained for  
126 viability exclusion using Zombie NIR Fixable Viability dye (BioLegend, San Diego, California) for  
127 10 minutes, followed by a 20-minute incubation with a panel of directly conjugated monoclonal  
128 antibodies and TruStain diluted in equal parts of FACS buffer (PBS containing 0.1% sodium  
129 azide and 1% bovine serum albumin) and Brilliant Stain Buffer (BD Biosciences, San Jose,  
130 California). After staining, cells were fixed with 2% paraformaldehyde and were filtered by using  
131 filter caps for polystyrene FACS tubes before being acquired on a Cytex Aurora, a multispectral

132 flow cytometry system with, 405-, 488-, and 640-nm lasers. Monoclonal antibodies used in the  
133 panel can be accessed in Supplementary Table 2.

134 **Flow cytometry data analysis:** FCS files were exported from spectralflo software and imported  
135 into FlowJo v.10.6.2 for subsequent analysis with the use of the following plug-ins to visualize  
136 the data: DownSample (3.2), and t-distributed stochastic neighbor embedding (tSNE). First, the  
137 compensation matrix for the 20-color flow cytometry panel was generated to correct for  
138 fluorescence spillover emissions and applied to files. Dataset as such was used for the  
139 downstream analysis in both manual gating (Supplementary Fig.1) and automated analysis. For  
140 the automated analysis, events were first down-sampled from the CD45<sup>+</sup> CD3<sup>-</sup> CD19<sup>-</sup> gate  
141 across all samples using Down Sample. Clinical parameter categorical values for each sample  
142 were added to downsampled populations as metadata to enable identification of these groups,  
143 and these were then concatenated for analysis. tSNE was run using all parameters from the  
144 panel except Zombie NIR (Live/Dead), BV711(CD19), FITC(CD45) and APC-Cy7 (CD3).  
145 After generating the tSNE figures, manually gated immune cell subsets were overlaid to the  
146 figures to represent subsets from each cohort. (e.g., 17 “healthy controls,” 31 “severe,” and 29  
147 “recovered” patients). Computational analysis of flow cytometry data for monocytes were  
148 visualized by uniform manifold approximation and projection (UMAP) embedding. UMAP  
149 dimensionality reduction was done on the dataset using all parameters from the panel except  
150 Zombie NIR (Live/Dead), BV711(CD19) FITC(CD45) and APC-Cy7 (CD3). The data were  
151 projected in 2-dimensions using UMAP embeddings and clusters of major monocyte subsets  
152 were identified based on expression of lineage defining markers. We used R (version 4.2.1) with  
153 packages ggpubr, ggplot, psych, gridExtra, corrplot<sup>8,9</sup> to generate figures.

154

155 **Measurements of inflammatory biomarkers, chemokines, and cytokines:** The plasma  
156 collected from blood samples was stored at -20°C and batched until processing without a prior  
157 thaw. Using enzyme-linked immunosorbent assay (ELISA), the following inflammatory markers

158 were measured (Supplementary Table 3) including: Tissue inhibitor of metalloproteinases-1  
159 (TIMP-1), Tissue inhibitor of metalloproteinases-2 (TIMP-2), Monocyte chemotactic protein 1  
160 (MCP-1), Lipoprotein-Associated Phospholipase A2 (LpPLA2), oxidized low-density lipoprotein  
161 (Ox-LDL). To detect plasma cytokine and chemokine levels, plasma samples were processed  
162 using the multiplexed ELISA-based platform Quantibody® Human Inflammation Array 3  
163 (RayBiotech QAH-INF-3) in accordance with the manufacturer's protocol. Raw optical data were  
164 analyzed using the manufacturer's analysis tool to construct standard curves and determine  
165 absolute cytokine concentration.

166

167 **In-vitro Ox-LDL uptake experiment:** An in-vitro experiment was conducted to investigate the  
168 role of activated NK cells in the uptake of Ox-LDL by macrophages. 5ml of venous blood  
169 samples were collected from severe COVID-19 patients (n=6) in sodium citrate tubes, and  
170 Peripheral blood mononuclear cells (PBMCs) were isolated using Ficoll gradient centrifugation.  
171 The isolation of NK cells was performed using the Miltenyi Biotec NK cell isolation kit (130-092-  
172 657). Subsequently, NK cells were activated *in vitro* through incubation with autologous plasma.  
173 Concurrently, PBMCs were allowed to rest and were incubated in Teflon-coated wells for up to  
174 six days. This incubation stimulated the development of monocyte-derived macrophages  
175 (MDMs) from peripheral blood monocytes<sup>10</sup>. After six days, these monocyte-derived  
176 macrophages were exposed to a medium containing Ox-LDL, which had been commercially  
177 manufactured and dye-tagged with Dil, to assess the absorption of Dil-Ox-LDL (10 ug/mL). This  
178 assessment was carried out after a four-hour incubation period in the presence or absence of  
179 plasma-activated NK cells. The cells were subsequently washed twice with PBS, and the  
180 intensity of Dil staining was measured using flow cytometry. To identify macrophages, markers  
181 such as CD45, CD3, CD19, and CD14 were utilized. For fluorescence microscopy analysis, the  
182 cells were seeded into 12-well plates and incubated at 37°C for an additional 24 hours. Images

183 were acquired using an EVOS microscope, and the presence of Dil was detectable using an  
184 RFP filter (absorption peak: ~554 nm, emission peak: ~571 nm).

185 **scRNA-seq data analysis:** scRNA-seq data were obtained from a published dataset<sup>11</sup> The data  
186 file (in 'rds' format) downloaded from the cellxgene Data Portal ([https://cellxgene.Cziscience](https://cellxgene.cziscience.com/datasets)  
187 [.com /datasets](https://cellxgene.cziscience.com/datasets)) were read into R (version 4.2.1) session. Quality control was performed using  
188 Seurat (v3.1.5) to identify and filter out low-quality cells based on mitochondrial content and  
189 performing data preprocessing to prepare the data for downstream analysis. Cells with a  
190 percentage of mitochondrial genes greater than 10% were considered low quality and were  
191 filtered out. Prior to downstream analysis, the dataset was scaled and centered using  
192 "NormalizeData" and "ScaleData" functions. As the focus was on NK cells and monocytes and  
193 comparison between severe and control groups, specific subsets of scRNA-seq data set were  
194 separated and merged based on their metadata. The reanalysis included the standard Seurat  
195 workflow with "RunPCA" and the number of Principle component analysis (PCA) dimensions  
196 used was 30, with a resolution parameter of 0.5. An elbow plot was generated to determine the  
197 optimal number of principal components for downstream analysis. UMAP plots were generated  
198 to visualize the cell clusters and identify potential subpopulations. After the cell clusters had  
199 been obtained, the Differentially expressed genes (DEG) in each cluster was computed with  
200 'FindAllMarkers' (Supplementary Table 4)<sup>12,13</sup>. Marker genes were determined based on their  
201 average log-fold change (log<sub>2</sub>FC) and statistical significance (p-value and q-value).

202 Gene Ontology (GO) enrichment analysis was performed to gain insights into the biological  
203 processes associated with a set of genes of interest. The analysis was carried out using the  
204 clusterProfiler package in R (version 4.2.1)<sup>13</sup>. The significance threshold for enriched GO terms  
205 was set at a p-value cutoff of 0.05, and the Benjamini-Hochberg method was applied for multiple  
206 testing correction using GO terms with a q-value (adjusted p-value) below 0.05 were considered  
207 statistically significant. Cytoscape software (version 3.10.0) was used to visualize significant  
208 GO terms and integrate the GO terms to create a GO pathway network. For the DEGs, Kyoto



209 Encyclopedia of Genes and Genomes (KEGG) pathway enrichment was performed for the top  
210 200 DEGs. Enrichment analysis of the converted Entrez IDs was conducted to determine the  
211 significant KEGG pathways associated with the DEGs. The enrichKEGG function from the  
212 clusterProfiler package was utilized, specifying the gene IDs and the organism of interest (Homo  
213 sapiens, organism code 'hsa')<sup>14</sup>. This function identified overrepresented pathways based on a  
214 hypergeometric test. We employed the cnetplot function, to show the hub genes and pathways  
215 enriched.

216

217 **Statistical Analysis:** Graphs and heatmaps were prepared using GraphPad Prism, version 9.  
218 Data were statistically analyzed using their bundled software. One-way ANOVA<sup>15</sup> was used to  
219 compare three or more groups followed by Dunn's multiple comparisons test for pairwise  
220 comparisons. Comparisons between two groups were performed using the Wilcoxon rank-sum  
221 test. To analyze the relationship between immune signatures and plasma biomarkers, Pearson  
222 correlation coefficient was calculated and plotted on a correlogram using R 4.2.1. Scatter plots  
223 showing linear relationships between data were created for significant correlations. Data  
224 visualization was achieved using functions from the Seurat, ggplot2, and pheatmap packages.

225

226 **Results:**

227 **Study design and cohort demographics:** In this cross-sectional study, we assessed the  
228 immune profile in fresh whole blood samples from patients across three groups: 1) healthy  
229 donors: seventeen healthy age/sex-matched adults (n=17) who were SARS-CoV-2  
230 immunoglobulin G (IgG) seronegative and asymptomatic at sampling as controls, 2) patients  
231 with severe COVID-19: thirty-one patients (n=31) with sampling on day one of intensive care  
232 unit admission for severe COVID-19 and respiratory failure, and 3) recovered patients: twenty-  
233 nine individuals with complete clinical recovery (n = 29) sampled three months after severe  
234 COVID-19 infection. Supplementary Table 1 and Materials and Methods both provide more

235 specific patient characteristics. To minimize inter-experimental variability between patients and  
236 controls, all samples (n=77) were acquired, processed, and analyzed fresh between April 2020  
237 and December 2020. Samples were analyzed using a 20-color spectral flow cytometer  
238 (Supplementary Table 1, gating strategy in Supplementary Fig.1).

239

#### 240 **Temporal dynamics of innate immune signatures and dysregulations in severe COVID-**

241 **19:** We applied conventional flow cytometry and tSNE dimensionality reduction plots gated on  
242 CD45<sup>+</sup>CD3<sup>-</sup>CD19<sup>-</sup> cells, which allowed for the identification and visualization of 10 innate  
243 immune cell populations (Fig.1A). The clustering algorithm allowed for an unbiased  
244 representation of these clusters during each stage of the disease. Among the dominant innate  
245 cell subsets that were focused on this study, we observed a significant increase in the  
246 frequencies of eosinophils (p<0.05) and neutrophils (p<0.05) among severe covid-19 patients  
247 (Fig.1B). While no differences were observed in the frequency of total monocytes between the  
248 control and severe groups, an overall increase in their frequencies was observed following  
249 recovery (p<0.05). Total NK cell frequencies were significantly decreased during severe  
250 infection and returned to basal levels after recovery, similar to previously published data<sup>16</sup>. We  
251 next analyzed the connectivity of cellular profiles and cytokine levels (detailed in Fig.2) in each  
252 study group. Heatmaps depicting correlation between 48 plasma cytokines/chemokines and 10  
253 major innate immune cell subsets for the control, severe and recovered groups constructed  
254 based on Pearson correlation coefficient (Fig.1C). The correlation coefficients between those  
255 cell subsets were used to construct the density plot for each group. The density plot for Pearson  
256 correlation coefficients between three groups (control, severe, and recovered) comparing  
257 immune cell and cytokine data, provides a visual representation of the distribution of correlation  
258 coefficients for various pairs of variables between these groups (Fig.1D). Each line on the  
259 density plot represents one of the groups, and the plot can help reveal central tendency, spread  
260 and variability. A higher peak indicates a stronger central tendency toward certain correlation

261 values. Visually comparing the three density lines, you can assess differences or similarities in  
262 the correlations between the groups. Comparing the three group's density lines, we observe a  
263 greater overlap between severe and recovered group, compared to controls. Overall, the  
264 correlograms and density plots imply that the recovered donor group has a more similar  
265 distribution to severe patients than to the controls. PCA also revealed that three groups have  
266 differential cellular and cytokine profiles (Fig.1E). The volcano plot (Fig.1F) visualizes a  
267 sustained dysregulation of immune and biochemical parameters despite recovery from the  
268 disease. Overall, our data suggest that severe COVID-19 patients' innate cell responses are  
269 dysregulated, with some immune perturbations persisting even after assumed viral clearance  
270 and recovery (up to 90 days post-infection).

271

## 272 **Differential inflammatory and cardiovascular biomarker profiles following severe COVID-**

273 **19:** Next, we analyzed 48 cytokines, chemokines, and plasma biomarkers related to  
274 cardiovascular risk, including those associated with the 'cytokine storm' and post-acute  
275 sequelae of SARS-CoV-2 infection, in plasma samples (Fig.2A). Interestingly, seven of 33  
276 increased cytokine responses in the severe patients were also increased in the recovered  
277 population. Nine cytokines were decreased in severe patients and the recovered donors  
278 compared to levels in the healthy donors (Fig.2A). For a broader comparative analysis of  
279 proinflammatory protein profiles that exhibited differential expression among our study cohorts,  
280 we executed PCA on all the proteins identified in the plasma (Fig.2B). The control, severe, and  
281 recovered groups displayed distinct clustering, signifying significant dysregulation of  
282 inflammatory proteins both during and after severe COVID-19 infection. Interestingly, our  
283 findings reveal that metalloproteinase inhibitors, specifically TIMP-1 and TIMP-2, which are  
284 recognized for their pivotal roles in atherosclerosis, plaque development, and platelet  
285 aggregation<sup>17</sup>, were elevated in severe patients (Fig.2C and Fig.2D) and persisted even three  
286 months after recovery from severe COVID-19. We also found increased levels of MCP-1

287 (Fig.2E), which is known to mediate migration and infiltration of monocytes to tissues, in severe-  
288 COVID-19 patient's plasma. We also found an increase in Interferon-gamma inducible Protein  
289 10kDa (IP-10) (Supplementary Fig.2A), and decreased levels of CCL5/RANTES (Regulated on  
290 activation, normal T cell expressed and secreted) (Supplementary Fig.2B) and eotaxin  
291 (Supplementary Fig.2D) in severe patients compared to levels in the other groups. Levels of  
292 cardiometabolic and inflammatory biomarkers, including soluble CD14 (sCD14),  
293 lipopolysaccharide-binding protein (LBP), fatty acid binding protein 4 (FABP4), D-Dimer, C  
294 reactive protein (CRP), and tissue factor (Supplementary Fig.2), were elevated during severe  
295 disease, but levels in healthy and recovered participants were similar (Supplementary Fig.2).  
296 Notably, CRP and D-dimer levels, indicative of COVID-19 severity, may correlate with  
297 complications like acute respiratory distress syndrome (ARDS) and cardiovascular events.  
298 Unexpectedly, levels of Ox-LDL and LpPLA2 were decreased in severe and recovered patients,  
299 compared to levels in healthy controls (Fig.2F-G). This surprising finding highlights a persistent  
300 disruption in mechanisms involving modified lipoprotein homeostasis during and after severe  
301 COVID-19 infection.

302

303 **Monocyte subset dynamics in COVID-19: Implications for immune dysregulation.** Next,  
304 we examined monocyte subsets in our study populations. We observed elevated levels of  
305 CD14<sup>++</sup>CD16<sup>-</sup> "classical" monocytes in the recovered donors' whole blood compared to the  
306 other two groups (Fig.3A and B). In contrast, intermediate monocytes (CD14<sup>++</sup>CD16<sup>+</sup>) were  
307 increased in severe patients (Fig.3B), while the frequency of CD14<sup>-</sup>CD16<sup>+</sup> "non-classical"  
308 monocytes was reduced in severe COVID-19 patients. Monocytes were visualized in a two-  
309 dimensional space using UMAP in Flowjo 10.9.0 (Fig.3C), which showed unique sub-clusters  
310 depending on the disease condition. Control and recovered groups had similar clustering  
311 patterns, distinct from the severe group, and some island clusters exhibited differences,  
312 suggesting varying features between these cohorts. No statistically significant changes were

313 observed in CD27, CXCR3, and PD-1 receptor expression in classical and intermediate  
314 monocytes. However, the trend for decreased expression in PD-1 and increased CXCR3  
315 expression in non-classical monocytes in the severe COVID-19 group suggests a more  
316 proinflammatory phenotype displayed by this subset (Fig.3D and Supplementary Fig.3C). We  
317 noted significant increases in CXCR5-expressing intermediate monocytes among our study  
318 populations compared to controls, with elevated frequencies persisting from severe disease into  
319 the recovery phase (Fig.3D and E). Similar monocyte/macrophage subsets have previously  
320 been reported in atherosclerotic lesions<sup>18</sup>. In contrast, severe COVID-19 patients exhibited low  
321 levels of intermediate and classical monocytes expressing tissue residency markers (e.g.,  
322 CD69) in their peripheral circulation, and this reduction was also seen in the recovered group  
323 ( $p<0.05$ ) (Fig.3D, and F). Our results indicate persistent dysregulation of circulating monocytes  
324 post-COVID-19 recovery, involving alterations in frequencies, subsets, and functional markers.

325

326 **Dysregulated NK cell phenotypes associated with COVID-19 infection.** We and others have  
327 observed that COVID-19 infection alters total NK cell frequencies in peripheral blood<sup>16,19</sup>. Using  
328 a previously described gating strategy, CD56 and CD16 receptor expression were used to  
329 identify five distinct NK cell subsets<sup>20</sup> (Fig. 4A and B). NK cell subsets clustered differently  
330 among the three groups. Overall, patients with severe illness had considerably lower  
331 frequencies of all five NK cell subsets (Fig.4D). Furthermore, these subsets showed noticeable  
332 differences between groups in terms of expression of activation and tissue homing markers  
333 (Supplementary Fig.4). In all NK subsets, CD69, a marker of activation and tissue residency<sup>21</sup>  
334 was increased in individuals with severe COVID-19. Levels of CD69 on NK cell subsets was  
335 similar between healthy and recovered donors (Fig.4F). We also noted an increasing trend in  
336 HLA-DR expression during severe infection, suggesting NK cell activation during severe  
337 disease (Fig. 4G). Additionally, NKG2A expression (indicating an inhibitory NK phenotype)<sup>22</sup>  
338 was decreased among NK subsets in severe COVID-19 patients (Supplementary Fig.4B),

339 confirming NK cell activation during severe infection. We also noted significantly lower  
340 expression of CD27 in three of the NK subsets except CD56<sup>dim</sup>CD16<sup>-</sup> and CD56<sup>-</sup>CD16<sup>dim</sup>  
341 subsets in severe COVID-19 patients and recovered donors compared with controls (Fig.4E).  
342 CD27<sup>+</sup> NK cells are particularly important in mediating NK cell /T cell interaction via the CD27-  
343 CD70 pathway<sup>23</sup>.

344

### 345 **Implications of activated NK cells and monocytes on Oxidized LDL levels and potential**

346 **atherogenesis in severe COVID-19:** In order to determine whether the changes we observed

347 in innate cells were related to cardiometabolic biomarker levels, we performed Pearson

348 correlational analysis to assess associations between plasma biomarker data acquired through

349 ELISA and flow cytometry immune cell frequencies. As shown in Fig.2F and G, while most

350 biomarkers returned to basal levels after recovery, Ox-LDL and LpPLA2 (which co-traffics Ox-

351 LDL into tissue) levels remained decreased significantly even after recovery. Ox-LDL is

352 recognized as a key player in the development of atherosclerosis (atherogenesis)<sup>24</sup>. We

353 identified multiple correlations between immune cell data and plasma Ox-LDL (Fig.5A and B).

354 We discovered a strong negative correlation between CD69<sup>+</sup> NK cells and Ox-LDL levels

355 (Fig.5C-D and Supplementary Fig.5A-D) as well as a negative correlation between Ox-LDL and

356 activated (CD69<sup>+</sup>) total monocytes (Fig.5F), activated (CD69<sup>+</sup>) classical monocytes (Fig.5G) and

357 intermediate monocytes (Fig.5H) among our severe COVID-19 patients. Monocytes migrate into

358 the arterial wall and differentiate into macrophages, where these cells can internalize Ox-LDL

359 and transform into foam cells<sup>25</sup>. Therefore, our findings suggest a novel mechanism underlying

360 the reduction of Ox-LDL levels in severe COVID-19 patients, potentially driven by activated NK

361 cells contributing to increased consumption of Ox-LDL from the circulation by MDMs, leading to

362 increased foam cell formation and subsequent atherogenesis in COVID-19 patients.

363

364 **Transcriptional profiling and functional differentiation of monocytes and NK cells in**  
365 **severe COVID-19:** We validated the phenotypic changes observed in flow cytometry and  
366 plasma biomarker assays using a publicly available single-cell RNA sequencing (scRNA-seq)  
367 dataset from Schulte-Schrepping et al.<sup>11</sup> For both NK cells and monocytes, we identified 2307  
368 and 1815 DEGs (adjusted p-value < 0.05 & positive log<sub>2</sub>FC) (Supplementary Fig.6A), selecting  
369 the top 200 DEGs for GO enrichment analysis (Supplementary Table 4 and 5). UMAP figures in  
370 Supplementary Fig.6B showcased immune cell annotations and clustering based on disease  
371 condition (control vs. severe COVID-19), with DEG analysis separately conducted for NK cells  
372 and monocytes. Heatmaps in Supplementary Fig.6C (monocytes) and Fig.6D (NK cells)  
373 provided an overview of transcriptional profile differences. Our analysis, incorporating the top  
374 200 DEGs, revealed that transcriptional profiles phenotypically and functionally distinguished  
375 severe COVID-19 patients from uninfected counterparts. Volcano plots (Supplementary Fig.6D  
376 and E) displayed upregulated (red) and downregulated (green) genes. Our flowcytometry  
377 analysis revealed that severe patients and recovered donors both exhibited an increased  
378 presence of intermediate monocytes (as shown in Fig.2B). This difference was found to be  
379 statistically significant (p<0.05). Incidentally, our transcriptome analysis revealed an  
380 upregulation of *CD36*, a gene known to be more expressed in intermediate monocytes. *CD36*  
381 encodes a receptor for Ox-LDL, and it plays a role in binding and internalizing Ox-LDL.  
382 Additionally, our analysis predicted multiple epigenetic modifications occurring as a result of  
383 severe infection. This prediction was corroborated by a high number of DEGs associated with  
384 histone modification and DNA methylation. Examples of these genes include *H1-4*, *H1-3*, *H1-10*,  
385 *H1-2*, and *SETD2* (Supplementary Table 4). In monocytes, we observed significant  
386 upregulation in expression of *CXCL2*, *IL1b* and *NLRP3* other notable genes suggestive of a  
387 proinflammatory phenotype in monocytes. (Fig.6A & Supplementary Table 4). Similarly, in NK  
388 cells, we detected upregulation of genes indicative of migration, inflammation, and activation,  
389 including *ICAM3*, *TNFAIP3*, *CD69*, and *IL12RB1* (Fig.6B & Supplementary Table 4). Some

390 genes like *ICAM3*, *TNFSF12*, *TNFSF1214*, *NLRP3* and *BRD2* were upregulated in both cell  
391 types (Supplementary Table 4).

392

### 393 **Pathway analysis reveals intriguing interplay between viral response and lipid storage**

394 **regulation in macrophages, highlighting persistent changes in innate cells:** Furthermore,

395 we conducted GO enrichment analysis to explore the functional enrichment of the DEGs, and

396 the KEGG database was used to group these differentially expressed genes into gene

397 pathways. We utilized the GO database and considered GO terms with a p-value < 0.05

398 significantly enriched (Fig6C-D & Supplementary Table 5). Our analysis revealed significant

399 enrichment in GO terms associated with lasting cellular epigenetic changes. This pattern was

400 consistent in both NK cells and monocytes during severe infection. Both cell types showed

401 enriched pathways related to dysregulated unfolded protein response, particularly regulation of

402 endoplasmic reticulum (ER) stress. In monocytes, we found significant enrichment in GO terms

403 like "leukocyte chemotaxis", "myeloid leukocyte migration", and "phagocytosis engulfment",

404 suggesting potential activation and differentiation of migratory, phagocytic macrophages. In NK

405 cells, GO pathway analysis highlighted the importance of "defense response to virus" and "viral-

406 induced Pattern recognition receptor (PRR) pathway signaling" in combating SARS-CoV-2

407 infection.

408 Interestingly, we observed an overlap between DEGs and enriched GO terms in NK cells and

409 monocytes. Genes like *STAT*, *TNFAIP3*, and *NFKBIA* were differentially expressed and

410 enriched in multiple GO terms. We used Cytoscape v3.10.0 to create network visualizations of

411 enriched GO pathways for monocytes (Fig.6E) and NK cells (Fig.6F). The monocyte network

412 has 57 nodes, while the NK cell network has 39 nodes, each representing a specific GO

413 pathway. The edges between nodes indicate potential relationships between pathways based

414 on shared genes. Lighter node colors indicate greater statistical significance for pathway

415 enrichment. Connections between pathways in the network imply shared genes, suggesting



416 possible crosstalk or cooperation in biological processes. Node color signifies pathway  
417 enrichment significance, and lighter shades indicate stronger significance. Edges represent  
418 shared genes, hinting at potential functional links, like crosstalk or cooperation between  
419 pathways due to shared genes in biological processes. In monocytes, a significant network  
420 emerges with interconnected pathways such as macrophage activation, phagocytosis, ER  
421 stress, acute inflammatory response, and lipid storage regulation. This network has the potential  
422 to fuel atherogenesis through immune system activation. A prominent connection arises in NK  
423 cells between defense response to viruses, PRR signaling, and stem cell differentiation  
424 regulation. This suggests that NK cells, when encountering viruses, adopt an activated  
425 migratory phenotype, potentially becoming dominant in circulation. Furthermore, the KEGG  
426 pathway analysis (Supplementary.Fig.6G-H) adds another layer of evidence to the notion of  
427 enduring alterations in innate cells and their potential impact on the post-acute consequences of  
428 SARS-CoV-2 infection. The amalgamation of differential gene expression and GO enrichment  
429 analysis offers a holistic understanding of the molecular terrain associated with severe COVID-  
430 19 and the enduring modifications in innate cells. This insight can potentially reveal valuable  
431 biomarkers and therapeutic targets for further exploration.

432

433 **Enhanced Ox-LDL uptake by monocyte-derived macrophages in the presence of**  
434 **autologous NK cells treated with plasma from severe COVID-19 patients:** Based on our  
435 observations of innate immune responses and plasma biomarkers in vivo and analysis of  
436 published single-cell data, we have identified a significant correlation between multiple activated  
437 NK cell subsets and plasma Ox-LDL. Our findings strongly imply that these activated NK cells  
438 play a pivotal role in enhancing the uptake of circulating Ox-LDL. To further investigate the  
439 contribution of activated NK cells to atherogenesis and substantiate our hypothesis, we  
440 conducted an in vitro experiment to explore the impact of activated NK cells on Ox-LDL uptake  
441 by macrophages (Fig.7A).

442 We employed a method as outlined in one of our earlier publications. Frozen PBMCs from  
443 severe COVID-19 patients (n = 6) were used to isolate NK cells. These NK cells were  
444 subsequently incubated with autologous plasma. Concurrently, autologous MDMs were  
445 generated from the same patient's PBMCs by allowing them to rest in Teflon-coated wells for up  
446 to six days. Following a six-day incubation period, we incubated these MDMs for four hours with  
447 commercially manufactured Dil-labeled Ox-LDL, both in the presence or absence of activated  
448 autologous NK cells. Interestingly, we observed significantly higher Dil-Ox-LDL uptake in the  
449 presence of activated NK cells (Wilcoxon signed rank-test;  $p < 0.05$  for all) (Fig.7B and C). The  
450 levels of Dil-Ox-LDL were quantified using flow cytometry, and this was further confirmed  
451 through EVOS microscope images (Fig.6D). Microscopic images were acquired to detect cells  
452 with internalized Dil-Ox-LDL using an RFP/TRITC filter set (absorption peak: ~554 nm,  
453 emission peak: ~571 nm). In summary, our findings collectively suggest that activated NK cells,  
454 in conjunction with other plasma factors, may be linked to increased Ox-LDL uptake and  
455 increased cardiovascular risk in individuals with severe COVID-19.

456

#### 457 **Discussion:**

458 The COVID-19 pandemic has shed light on a range of health concerns beyond acute respiratory  
459 symptoms of the disease, including atherosclerotic cardiovascular disease. Given that evidence  
460 from genome-wide association studies, imaging techniques and clinical intervention studies  
461 confirm innate immune involvement in accelerating atherosclerosis<sup>26</sup>, it is likely that the immune  
462 perturbations following SARS-CoV-2 infection may be a key driver in COVID-19 associated  
463 CVDs. Our study provides mechanistic evidence to support the importance of unique  
464 macrophage-NK crosstalk during severe COVID-19 infection in promoting long-term  
465 atherogenesis. We show that in the proinflammatory environment of severe COVID-19, subsets  
466 of NK cells with altered phenotypes help macrophages take up modified lipids (Ox-LDL) and  
467 enhance foam cell generation. Our study also highlights a persistence of the pro-atherogenic

468 potential following recovery from severe COVID-19, as evidenced by these innate immune  
469 alterations and disturbances in cardiometabolic biomarkers persisting up to three months after  
470 recovery.

471 Monocytes and macrophages play a crucial role in the development of atherosclerosis, both as  
472 mediators of chronic inflammation and plaque generation through lipid uptake<sup>27</sup>. Monocytes  
473 migrate from the bloodstream to the vessel wall, where they transform into tissue macrophages.  
474 These tissue macrophages subsequently convert into foam cells by taking up modified  
475 cholesterol, in particular Ox-LDL, initiating atherogenesis<sup>28</sup>. Our observations of significant  
476 increases in circulating intermediate monocytes in our severe COVID-19 patients (and  
477 remaining elevated post-recovery) suggests that atherogenesis may occur more readily during  
478 and after severe COVID-19 infection, as proinflammatory monocyte subsets such as these have  
479 a greater potential for trans-endothelial migration and vessel wall adhesion<sup>5</sup>. Increased CXCR5  
480 expression in this monocyte subset among both severe COVID-19 patients and those who  
481 recovered further enhances their chemotactic potential towards inflamed vascular intimal tissue  
482 rich in its ligand CXCL13<sup>29</sup>. In addition, we noted elevated levels of other chemokine ligands like  
483 MCP-1<sup>30</sup> in the plasma of severe COVID-19 patients. This may be a valid explanation to our  
484 observations of decreased CD69-expressing intermediate (tissue-resident) monocytes in the  
485 circulation of severe COVID-19 patients. Simultaneous reductions in Ox-LDL and LpPLA2  
486 during severe infection, persisting even after recovery may indicate ongoing consumption of  
487 these atherogenic mediators. This may suggest that these intermediate monocytes leaving the  
488 circulation to transform into intimal macrophages may play a role in Ox-LDL consumption.

489 Contradicting evidence suggest that in COVID-19 patients, during early recovery, higher levels  
490 of Ox-LDL are likely to be observed<sup>31</sup>. However, these studies did not account for other risk  
491 factors of atherosclerosis and those which dysregulate lipid metabolism, including diabetes  
492 mellitus and hypertension. Considering the fact that we excluded majority of these factors  
493 suggest their exclusion may influence the outcome of our data which shows the onset of

494 atherogenesis and role of Ox-LDL uptake in its early stages. Our analyses of transcriptome  
495 data from PBMCs of severe COVID-19 patients from external databases support our high-  
496 dimensional flowcytometry analyses, revealing enrichment in transcriptional pathways  
497 supporting chemotaxis, migration, phagocytosis, plasma membrane invagination, and  
498 engulfment, and upregulation of DEGs encoding macrophage scavenger receptors like CD36,  
499 SR-A and those involving lipid storage.

500 Monocytes/macrophages are the most investigated immune cells in atherosclerosis. However,  
501 there is now increasing preclinical and clinical evidence that NK cells play a significant role in its  
502 pathogenesis. Traditionally considered immune defenders against viruses<sup>32,33</sup> and cancer<sup>34</sup>, this  
503 heterogenous group of immune cells are now increasingly recognized for their diverse roles,  
504 including those related to disease pathogenesis. In the case of human atherosclerosis, most of  
505 the current knowledge on NK cell involvement comes from observational studies on  
506 atherosclerotic lesions using immunohistochemistry. Bonaccorsi et al. characterized NK cells in  
507 atherosclerotic plaques of asymptomatic patients and found that these were enriched in  
508 CD56<sup>bright</sup>perforin<sup>low</sup> NK cells, which also expressed tissue-resident markers such as CD69<sup>35</sup>.

509 While we and others have shown overall reductions in circulating NK cells during acute COVID-  
510 19<sup>16</sup>, we have also seen significantly increased expression of CD69 in these NK cells and their  
511 strong negative association with plasma Ox-LDL, suggesting that these NK cells may be linked  
512 to processes involving uptake of Ox-LDL from the circulation into tissue. Cytokines like TNF $\alpha$ ,  
513 among the other proinflammatory cytokines that likely flood the circulation during the cytokine  
514 storm of acute severe COVID-19, are known to be key modulators of NK cell cytotoxicity,  
515 cytokine production, and adhesion molecule upregulation, and influences receptor expression,  
516 including activating receptors like NKG2D and CD69. As evidenced by our NK cell  
517 transcriptional analysis showing enrichment of the chemokine signaling pathway, these  
518 activated NK cells may be increasingly recruited to inflamed tissue to eliminate infected cells<sup>36</sup>.

519 However, excessive NK cell activation can also promote tissue damage and inflammation.

520 Within this microenvironment, macrophages are reported to express NKG2D ligands (such as  
521 Major Histocompatibility Complex class I chain-related proteins A, MICA) suggesting the  
522 potential for direct macrophage-NK cell interactions. These interactions are known to promote  
523 macrophages to differentiate into proinflammatory M1 phenotype<sup>37</sup>.

524 Netea et al. demonstrated that, in addition to microbial stimuli, endogenous metabolites, such as  
525 Ox-LDL, that are abundant in the plaque microenvironment, train pro-atherogenic monocytes  
526 and macrophages, possibly via epigenetic modifications which may be the key driver leading to  
527 ongoing atherogenesis despite recovery from acute SARS-CoV-2 infection<sup>38</sup>. This would  
528 substantially increase future CVD risk in previously infected individuals. Analysis of single cell  
529 transcriptome data of monocytes and NK cells found enriched pathways related to histone  
530 modifications, crucial for epigenetic changes, further confirming the possibility of trained  
531 immunity following severe COVID-19 infection.

532 Within vascular intimal tissue, hydrolysis of Ox-LDL into oxidized fatty acids contribute to  
533 endothelial dysfunction, inflammation, and foam cell formation which may alter vascular  
534 architecture<sup>39</sup>. Progressive atherogenesis and vascular remodeling, reflected by persistent  
535 elevations in plasma TIMP-1 and TIMP-2 despite recovery<sup>40</sup> is likely to contribute to the  
536 increased thromboembolic events documented following acute severe COVID-19 which has  
537 drawn significant scientific interest<sup>41</sup>. Indeed, Severe COVID-19 patients in our study showed a  
538 likely procoagulant state, evident from significantly elevated D-dimer levels, a marker of  
539 thromboembolic disease severity<sup>42</sup>. While the procoagulant state in COVID-19 is complex<sup>43</sup>, our  
540 study suggests that unique dysregulations in monocyte/macrophage and NK cell activity may  
541 contribute to thrombosis, by damaging the endothelium, promoting atherogenesis, and  
542 disrupting wall architecture. This interpretation aligns with the classical Virchow's triad, which  
543 describes factors contributing to thrombosis. NK cell infiltration in particular may additionally  
544 damage the endothelium and disrupt wall architecture via perforin and granzyme B<sup>44</sup> and

545 elevate tissue factor levels (as seen in our severe COVID-19 patients), initiating the coagulation  
546 cascade by combining with activated factor VII<sup>45</sup>.

547 Our study is limited to the analysis of a small, cross-sectional cohort of individuals with severe  
548 COVID-19 infection. Furthermore, all samples were collected during the early phases of the  
549 COVID-19 pandemic, and thus our findings are pertinent only to the SARS-CoV-2 strains that  
550 circulated during that time in a pre-vaccination timeframe. Despite these limitations, our study  
551 provides a novel perspective on the pathophysiological events driven by monocytes and NK  
552 cells during severe COVID-19. These events ultimately contribute to atherogenesis and  
553 coagulopathy, leading to enduring cardiovascular and thromboembolic disease risks. The  
554 insights gained from this research pave the way for future therapeutic strategies aimed at  
555 mitigating COVID-related cardiovascular and thromboembolic events by targeting these  
556 mechanistic pathways.

557

#### 558 **Acknowledgments:**

559 The authors gratefully acknowledge the support of all study individuals and their families. This  
560 work was partially supported by National Center for Advancing Translational Sciences  
561 (KL2TR002734 and UL1TR002733 to [J.S.B.]). We also, like to thank Sarah Karow and  
562 Gabrielle Swoope for their efforts in sample collection and clinical coordination.

563

#### 564 **Author Contribution:**

565 M.G, Y.W and M.A performed experiments, data analysis and, wrote the manuscript. E.B, J.G  
566 and A.K, performed lipid biomarker experiments. A.V. and A.K, performed cytokine experiments  
567 and edited the manuscript. J.H, S.S, S.P, S.L and J.B coordinated clinical sample collection and  
568 edited the manuscript. D.K and K.W. supervised data analysis, S.W and M.G performed  
569 transcriptome data analysis, N.F supervised lipid biomarker experiments and wrote the  
570 manuscript, T.D, and N.L designed the study and wrote the manuscript.

571

572

573 **Data Availability:**

574 The data that support the findings of this study are available from the corresponding author  
575 upon reasonable request.

576

577

578 **References:**

- 579 1 Kunutsor, S. K. & Laukkanen, J. A. Cardiovascular complications in COVID-19: A  
580 systematic review and meta-analysis. *J Infect* **81**, e139-e141,  
581 doi:10.1016/j.jinf.2020.05.068 (2020).
- 582 2 Vilaplana-Carnerero, C. *et al.* Atherosclerosis, Cardiovascular Disease, and COVID-19: A  
583 Narrative Review. *Biomedicines* **11**, doi:10.3390/biomedicines11041206 (2023).
- 584 3 Makarova, Y. A. *et al.* Atherosclerosis, Cardiovascular Disorders and COVID-19:  
585 Comorbid Pathogenesis. *Diagnostics (Basel)* **13**, doi:10.3390/diagnostics13030478  
586 (2023).
- 587 4 Chaves, S. S. *et al.* Global, regional and national estimates of influenza-attributable  
588 ischemic heart disease mortality. *EClinicalMedicine* **55**, 101740,  
589 doi:10.1016/j.eclinm.2022.101740 (2023).
- 590 5 Kapellos, T. S. *et al.* Human Monocyte Subsets and Phenotypes in Major Chronic  
591 Inflammatory Diseases. *Front Immunol* **10**, 2035, doi:10.3389/fimmu.2019.02035 (2019).
- 592 6 Eberhardt, N. *et al.* SARS-CoV-2 infection triggers pro-atherogenic inflammatory  
593 responses in human coronary vessels. *bioRxiv*, doi:10.1101/2023.08.14.553245 (2023).
- 594 7 Michel, T., Hentges, F. & Zimmer, J. Consequences of the crosstalk between  
595 monocytes/macrophages and natural killer cells. *Front Immunol* **3**, 403,  
596 doi:10.3389/fimmu.2012.00403 (2012).
- 597 8 Zou, C. *et al.* CD48 is a key molecule of immunomodulation affecting prognosis in glioma.  
598 *Onco Targets Ther* **12**, 4181-4193, doi:10.2147/OTT.S198762 (2019).
- 599 9 Zhou, X. *et al.* Novel Necroptosis-Related Gene Signature for Predicting Early Diagnosis  
600 and Prognosis and Immunotherapy of Gastric Cancer. *Cancers (Basel)* **14**,  
601 doi:10.3390/cancers14163891 (2022).
- 602 10 Bowman, E. R. *et al.* Macrophage maturation from blood monocytes is altered in people  
603 with HIV, and is linked to serum lipid profiles and activation indices: A model for studying  
604 atherogenic mechanisms. *PLoS Pathog* **16**, e1008869, doi:10.1371/journal.ppat.1008869  
605 (2020).
- 606 11 Schulte-Schrepping, J. *et al.* Severe COVID-19 Is Marked by a Dysregulated Myeloid Cell  
607 Compartment. *Cell* **182**, 1419-1440 e1423, doi:10.1016/j.cell.2020.08.001 (2020).
- 608 12 Zhao, G. *et al.* Single-cell RNA sequencing reveals the cellular heterogeneity of  
609 aneurysmal infrarenal abdominal aorta. *Cardiovasc Res* **117**, 1402-1416,  
610 doi:10.1093/cvr/cvaa214 (2021).
- 611 13 Wu, T. *et al.* clusterProfiler 4.0: A universal enrichment tool for interpreting omics data.  
612 *Innovation (Camb)* **2**, 100141, doi:10.1016/j.xinn.2021.100141 (2021).

- 613 14 Yu, G., Wang, L. G., Han, Y. & He, Q. Y. clusterProfiler: an R package for comparing  
614 biological themes among gene clusters. *OMICS* **16**, 284-287, doi:10.1089/omi.2011.0118  
615 (2012).
- 616 15 Dixon, K. J. *et al.* MyD88 is an essential regulator of NK cell-mediated clearance of MCMV  
617 infection. *Mol Immunol* **137**, 94-104, doi:10.1016/j.molimm.2021.07.001 (2021).
- 618 16 Maucourant, C. *et al.* Natural killer cell immunotypes related to COVID-19 disease  
619 severity. *Sci Immunol* **5**, doi:10.1126/sciimmunol.abd6832 (2020).
- 620 17 Papazafiropoulou, A. & Tentolouris, N. Matrix metalloproteinases and cardiovascular  
621 diseases. *Hippokratia* **13**, 76-82 (2009).
- 622 18 Halvorsen, B. *et al.* Activated platelets promote increased monocyte expression of CXCR5  
623 through prostaglandin E2-related mechanisms and enhance the anti-inflammatory effects  
624 of CXCL13. *Atherosclerosis* **234**, 352-359, doi:10.1016/j.atherosclerosis.2014.03.021  
625 (2014).
- 626 19 Ahmed-Hassan, H. *et al.* Innate Immune Responses to Highly Pathogenic Coronaviruses  
627 and Other Significant Respiratory Viral Infections. *Front Immunol* **11**, 1979,  
628 doi:10.3389/fimmu.2020.01979 (2020).
- 629 20 Hartana, C. A. *et al.* Immune correlates of HIV-1 reservoir cell decline in early-treated  
630 infants. *Cell Rep* **40**, 111126, doi:10.1016/j.celrep.2022.111126 (2022).
- 631 21 Duault, C. *et al.* Activated natural killer cells predict poor clinical prognosis in high-risk B-  
632 and T-cell acute lymphoblastic leukemia. *Blood* **138**, 1465-1480,  
633 doi:10.1182/blood.2020009871 (2021).
- 634 22 Kamiya, T., Seow, S. V., Wong, D., Robinson, M. & Campana, D. Blocking expression of  
635 inhibitory receptor NKG2A overcomes tumor resistance to NK cells. *J Clin Invest* **129**,  
636 2094-2106, doi:10.1172/JCI123955 (2019).
- 637 23 Titanji, K. *et al.* Altered distribution of natural killer cell subsets identified by CD56, CD27  
638 and CD70 in primary and chronic human immunodeficiency virus-1 infection. *Immunology*  
639 **123**, 164-170, doi:10.1111/j.1365-2567.2007.02657.x (2008).
- 640 24 Hong, C. G. *et al.* Oxidized low-density lipoprotein associates with cardiovascular disease  
641 by a vicious cycle of atherosclerosis and inflammation: A systematic review and meta-  
642 analysis. *Front Cardiovasc Med* **9**, 1023651, doi:10.3389/fcvm.2022.1023651 (2022).
- 643 25 Khatana, C. *et al.* Mechanistic Insights into the Oxidized Low-Density Lipoprotein-Induced  
644 Atherosclerosis. *Oxid Med Cell Longev* **2020**, 5245308, doi:10.1155/2020/5245308  
645 (2020).
- 646 26 Wolf, D. & Ley, K. Immunity and Inflammation in Atherosclerosis. *Circ Res* **124**, 315-327,  
647 doi:10.1161/CIRCRESAHA.118.313591 (2019).
- 648 27 Flynn, M. C., Pernes, G., Lee, M. K. S., Nagareddy, P. R. & Murphy, A. J. Monocytes,  
649 Macrophages, and Metabolic Disease in Atherosclerosis. *Front Pharmacol* **10**, 666,  
650 doi:10.3389/fphar.2019.00666 (2019).
- 651 28 Marchio, P. *et al.* Targeting Early Atherosclerosis: A Focus on Oxidative Stress and  
652 Inflammation. *Oxid Med Cell Longev* **2019**, 8563845, doi:10.1155/2019/8563845 (2019).
- 653 29 Smedbakken, L. M. *et al.* Increased levels of the homeostatic chemokine CXCL13 in  
654 human atherosclerosis - Potential role in plaque stabilization. *Atherosclerosis* **224**, 266-  
655 273, doi:10.1016/j.atherosclerosis.2012.06.071 (2012).
- 656 30 Lin, J., Kakkar, V. & Lu, X. Impact of MCP-1 in atherosclerosis. *Curr Pharm Des* **20**, 4580-  
657 4588, doi:10.2174/1381612820666140522115801 (2014).
- 658 31 Mouchati, C. *et al.* Increase in gut permeability and oxidized ldl is associated with post-  
659 acute sequelae of SARS-CoV-2. *Front Immunol* **14**, 1182544,  
660 doi:10.3389/fimmu.2023.1182544 (2023).
- 661 32 Vaccari, M. *et al.* Adjuvant-dependent innate and adaptive immune signatures of risk of  
662 SIVmac251 acquisition. *Nat Med* **22**, 762-770, doi:10.1038/nm.4105 (2016).



- 663 33 Liyanage, N. P. *et al.* Antiretroviral therapy partly reverses the systemic and mucosal  
664 distribution of NK cell subsets that is altered by SIVmac(2)(5)(1) infection of macaques.  
665 *Virology* **450-451**, 359-368, doi:10.1016/j.virol.2013.12.003 (2014).
- 666 34 Palano, M. T. *et al.* When a Friend Becomes Your Enemy: Natural Killer Cells in  
667 Atherosclerosis and Atherosclerosis-Associated Risk Factors. *Front Immunol* **12**, 798155,  
668 doi:10.3389/fimmu.2021.798155 (2021).
- 669 35 Bonaccorsi, I. *et al.* Symptomatic Carotid Atherosclerotic Plaques Are Associated With  
670 Increased Infiltration of Natural Killer (NK) Cells and Higher Serum Levels of NK Activating  
671 Receptor Ligands. *Front Immunol* **10**, 1503, doi:10.3389/fimmu.2019.01503 (2019).
- 672 36 Kumar, A. *et al.* SARS-CoV-2 cell entry receptor ACE2 mediated endothelial dysfunction  
673 leads to vascular thrombosis in COVID-19 patients. *Med Hypotheses* **145**, 110320,  
674 doi:10.1016/j.mehy.2020.110320 (2020).
- 675 37 Weber, C. & Noels, H. Atherosclerosis: current pathogenesis and therapeutic options. *Nat*  
676 *Med* **17**, 1410-1422, doi:10.1038/nm.2538 (2011).
- 677 38 Netea, M. G. *et al.* Defining trained immunity and its role in health and disease. *Nat Rev*  
678 *Immunol* **20**, 375-388, doi:10.1038/s41577-020-0285-6 (2020).
- 679 39 Chen, J. *et al.* Lp-PLA(2) (Lipoprotein-Associated Phospholipase A(2)) Deficiency Lowers  
680 Cholesterol Levels and Protects Against Atherosclerosis in Rabbits. *Arterioscler Thromb*  
681 *Vasc Biol* **43**, e11-e28, doi:10.1161/ATVBAHA.122.317898 (2023).
- 682 40 Zureik, M., Beaudoux, J. L., Courbon, D., Benetos, A. & Ducimetiere, P. Serum tissue  
683 inhibitors of metalloproteinases 1 (TIMP-1) and carotid atherosclerosis and aortic arterial  
684 stiffness. *J Hypertens* **23**, 2263-2268 (2005).
- 685 41 Wu, Z. & McGoogan, J. M. Characteristics of and Important Lessons From the  
686 Coronavirus Disease 2019 (COVID-19) Outbreak in China: Summary of a Report of  
687 72 314 Cases From the Chinese Center for Disease Control and Prevention. *JAMA* **323**,  
688 1239-1242, doi:10.1001/jama.2020.2648 (2020).
- 689 42 Guan, W. J. *et al.* Clinical Characteristics of Coronavirus Disease 2019 in China. *N Engl*  
690 *J Med* **382**, 1708-1720, doi:10.1056/NEJMoa2002032 (2020).
- 691 43 Madoiwa, S. Recent advances in disseminated intravascular coagulation: endothelial cells  
692 and fibrinolysis in sepsis-induced DIC. *J Intensive Care* **3**, 8, doi:10.1186/s40560-015-  
693 0075-6 (2015).
- 694 44 Selathurai, A. *et al.* Natural killer (NK) cells augment atherosclerosis by cytotoxic-  
695 dependent mechanisms. *Cardiovasc Res* **102**, 128-137, doi:10.1093/cvr/cvu016 (2014).
- 696 45 Olson, N. C. *et al.* Soluble CD14, Ischemic Stroke, and Coronary Heart Disease Risk in a  
697 Prospective Study: The REGARDS Cohort. *J Am Heart Assoc* **9**, e014241,  
698 doi:10.1161/JAHA.119.014241 (2020).
- 699
